# Supplementary material for: Hepatitis B e antigen induces the expansion of monocytic myeloid-derived suppressor cells to dampen T-cell function in chronic hepatitis B virus infection
Source: PubMed Central journal article supplement (PMC6472891; doi:10.1371/journal.ppat.1007690), 2019-04-18
Supplement: ppat.1007690.s012.pdf [file ppat.1007690.s012.pdf]

**S1 Table. Clinical characteristics of enrolled subjects for analyzing frequency of mMDSCs in whole blood**

| <b>Group</b>                           | <b>HC</b>    | <b>IT</b>      | <b>IA<sup>+</sup></b> | <b>IC</b>    | <b>IA<sup>-</sup></b> |
|----------------------------------------|--------------|----------------|-----------------------|--------------|-----------------------|
| <b>Gender (M/F)</b>                    | 7/13         | 10/8           | 7/4                   | 9/6          | 9/4                   |
| <b>Age (y)</b>                         | 36.9±8.81    | 29.27±4.76     | 38.63±8.68            | 43.15±9.73   | 41.25±9.71            |
| <b>ALT(U/l)</b>                        | 33±11.10     | 24±5.72        | 93.25±71.53           | 26.23±14.32  | 83.62±83.97           |
| <b>HBsAg (log<sub>10</sub>IU/ml)</b>   | undetectable | 4.69±0.043     | 3.98±0.70             | 2.78±0.90    | 3.00±0.58             |
| <b>HBeAg (S/CO)</b>                    | undetectable | 1551.97±125.57 | 905.81±694.21         | undetectable | undetectable          |
| <b>HBV DNA (log<sub>10</sub>IU/ml)</b> | undetectable | 7.57±0.042     | 6.99±0.59             | undetectable | 4.17±0.78             |

HC: Healthy controls; IT: immune-tolerant; IA<sup>+</sup>: HBeAg (+) chronic hepatitis B; IC:

inactive HBV carriers state; IA<sup>-</sup>: HBeAg (-) chronic hepatitis B
