# Supplementary material for: Hepatitis B e antigen induces the expansion of monocytic myeloid-derived suppressor cells to dampen T-cell function in chronic hepatitis B virus infection
Source: PubMed Central journal article supplement (PMC6472891; doi:10.1371/journal.ppat.1007690), 2019-04-18
Supplement: ppat.1007690.s013.pdf [file ppat.1007690.s013.pdf]

**S2 Table. Clinical parameters of serum samples from enrolled healthy controls and Nuc-treated CHB patients**

| Group     | HBsAg (IU/ml) | HBeAg (S/CO) | HBVDNA (IU/ml) | ALT (IU/l) |
|-----------|---------------|--------------|----------------|------------|
| HBeAg (+) | 13061         | 1213.68      | <500           | 37         |
| HBeAg (-) | 13543         | undetectable | <500           | 30         |
| HC        | undetectable  | undetectable | undetectable   | 35         |

HBeAg (+): HBeAg-positive CHB patients

HBeAg (-): HBeAg-negative CHB patients

HC: healthy control
