# Supplementary material for: Hepatitis B e antigen induces the expansion of monocytic myeloid-derived suppressor cells to dampen T-cell function in chronic hepatitis B virus infection
Source: PubMed Central journal article supplement (PMC6472891; doi:10.1371/journal.ppat.1007690), 2019-04-18
Supplement: ppat.1007690.s014.pdf [file ppat.1007690.s014.pdf]

**S3 table. Gene-specific primers for RT-qPCR**

| Gene                | Primer (5'-3')                                                 | length<br>(bp) |
|---------------------|----------------------------------------------------------------|----------------|
| $\beta$ - actin     | F- AAG GTG ACA GCA GTC GGT T<br>R- TGT GTG GAC TTG GGA GAG G   | 195            |
| Arg1                | F- GTT TTG ATG TTG ACG GAC TG<br>R- GTA GCC CTG TTT TGT AGA TT | 120            |
| IL-10               | F- CCA AGA GAA AGG CAT CTA CA<br>R- GGG GGT TGA GGT ATC AGA G  | 84             |
| PDL1                | F- GGC TGA GCA AGG CAC ATA GT<br>R- CAC CAC AAG GAG GAG TTA GG | 61             |
| gp91                | F- TAT GAG GTG GTG ATG TTA GT<br>R- TTC AGA TTG GTG GCG TTA TT | 104            |
| IDO                 | F- CCC TTC AAG TGT TTC ACC AA<br>R- GTC TTC CCA GAA CCC TTC AT | 137            |
| iNOS                | F- GGT GAA AGA TGG AAC TTG CT<br>R- AAA TAC ACA GTG GTG CGA TA | 77             |
| P47 <sup>phox</sup> | F- GCT GTT GAG GTC ATT CAC AA<br>R- GCT GTT GAG GTC ATT CAC AA | 80             |

F: Forward Primer; R: Reverse Primer
